# Supplementary material
Source: publisher figshare collection journal article supplement (https://acs.figshare.com/ndownloader/files/3880846)
Supplement: Supplementary file 1 [file 3880846]

The following supplemental figures compare the observed and predicted mixing behaviors for all three types of simulated biomass particles investigated with the magnetic particle tracking method.

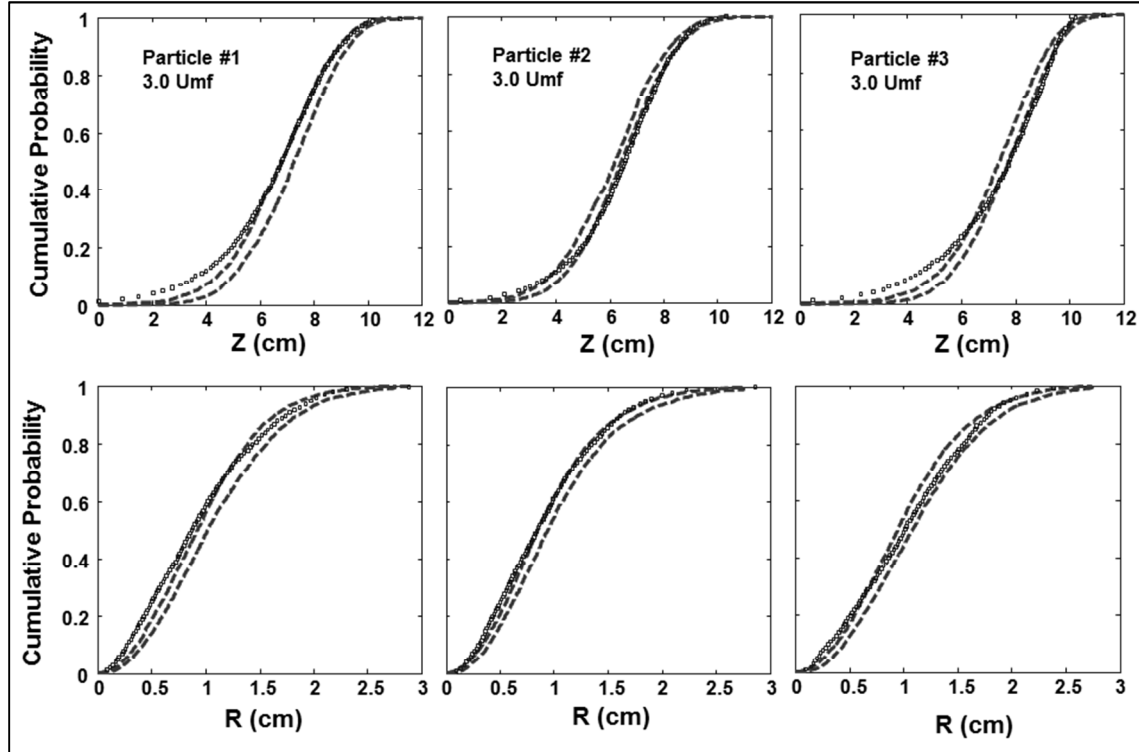

**Figure S1.** Comparison of time-average spatial distributions for particles #1-3 at 3.0  $U_{mf}$ . Dashed lines are upper and lower limits for random walk simulations. Small squares are experimental.

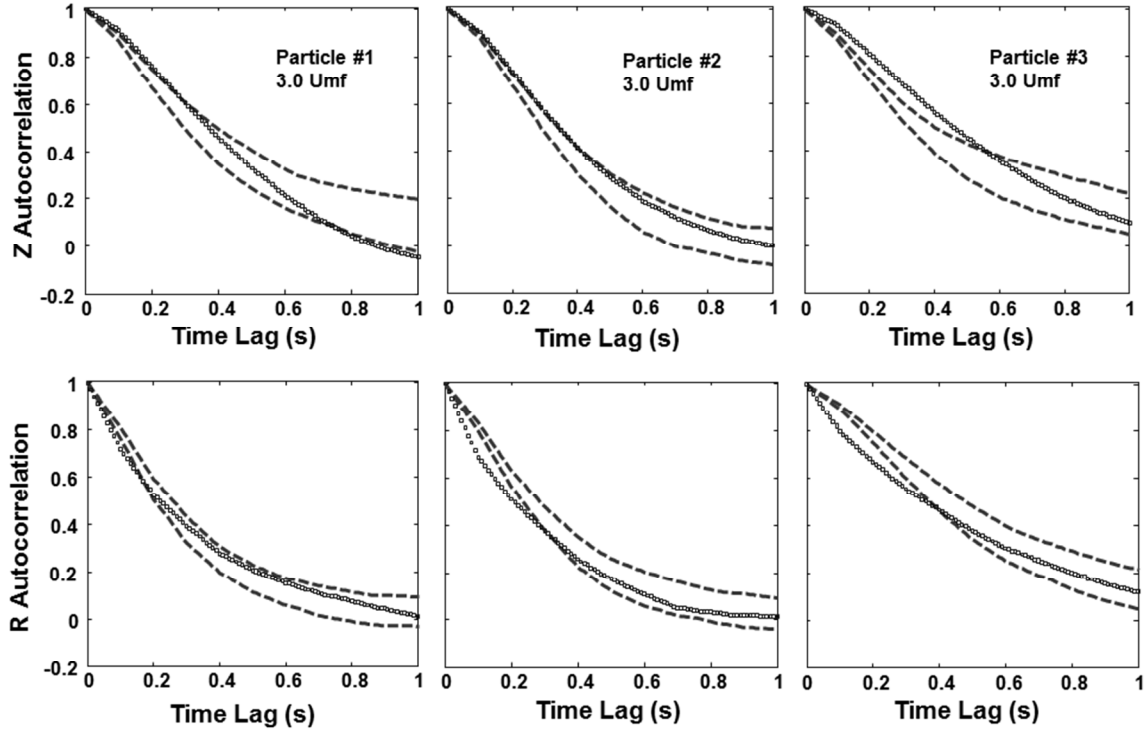

**Figure S2.** Comparison of autocorrelations in axial and radial locations for particles #1-3. Dashed lines are upper and lower limits for random walk simulations. Small squares are experimental.

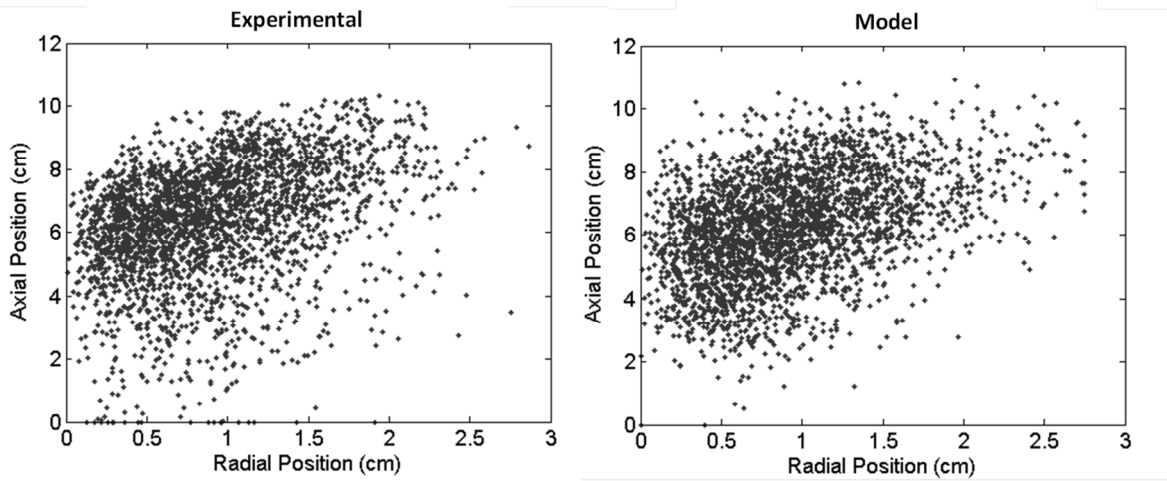

**Figure S3.** Comparison of the experimental #2 particle radial and axial locations at 0.1 s intervals versus those resulting from a single Monte Carlo realization of the random walk model at  $3U_{mf}$ .

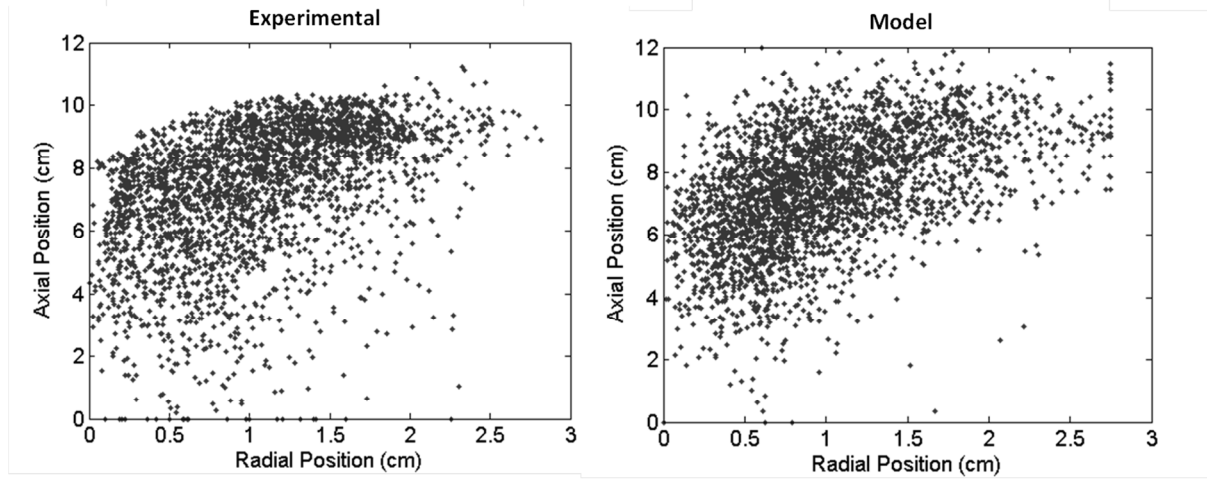

**Figure S4.** Comparison of the experimental #3 particle radial and axial locations at 0.1 s intervals versus those resulting from a single Monte Carlo realization of the random walk model at  $3U_{mf}$ .
